# Supplementary material
Source: PubMed Central journal article supplement (PMC3641888)
Supplement: NIHMS458578-supplement-01.pdf [file NIHMS458578-supplement-01.pdf]

## Supplementary Material

**Table S1. Race-specific multivariable adjusted hazard ratios and 95% confidence intervals for physical activity and stroke**

|                              | Poor<br>Physical Activity | Intermediate<br>Physical Activity | Ideal<br>Physical Activity | P for<br>trend |
|------------------------------|---------------------------|-----------------------------------|----------------------------|----------------|
| <b>African-Americans</b>     |                           |                                   |                            |                |
| <b>Total stroke</b>          |                           |                                   |                            |                |
| No. of cases                 | 252                       | 34                                | 21                         |                |
| Person-years                 | 40,763.7                  | 7,569.9                           | 6,311.0                    |                |
| Incidence rate *             | 6.18 (5.46,6.99)          | 4.49 (3.21,6.29)                  | 3.33 (2.17,5.10)           |                |
| Model 1 †#                   | 1                         | 0.76 (0.53,1.10)                  | 0.58 (0.37,0.90)           | 0.007          |
| Model 2 ‡#                   | 1                         | 0.84 (0.58,1.21)                  | 0.64 (0.41,1.01)           | 0.042          |
| Model 3 §#                   | 1                         | 0.89 (0.61,1.28)                  | 0.71 (0.45,1.11)           | 0.114          |
| <b>Total ischemic stroke</b> |                           |                                   |                            |                |
| No. of cases                 | 223                       | 31                                | 14                         |                |
| Person-years                 | 40,918.4                  | 7,575.1                           | 6,357.9                    |                |
| Incidence rate *             | 5.45 (4.78,6.21)          | 4.09 (2.88,5.82)                  | 2.20 (1.30,3.72)           |                |
| Model 1 †#                   | 1                         | 0.77 (0.53,1.13)                  | 0.43 (0.25,0.74)           | 0.001          |
| Model 2 ‡#                   | 1                         | 0.86 (0.59,1.26)                  | 0.49 (0.28,0.84)           | 0.010          |
| Model 3 §#                   | 1                         | 0.91 (0.62,1.33)                  | 0.53 (0.31,0.92)           | 0.030          |
| <b>Caucasians</b>            |                           |                                   |                            |                |
| <b>Total stroke</b>          |                           |                                   |                            |                |
| No. of cases                 | 244                       | 113                               | 76                         |                |
| Person-years                 | 86,499.8                  | 50,034.1                          | 34,392.2                   |                |
| Incidence rate *             | 2.82 (2.49,3.20)          | 2.26 (1.88,2.72)                  | 2.21 (1.76,2.77)           |                |
| Model 1 †#                   | 1                         | 0.79 (0.63,0.99)                  | 0.77 (0.59,1.00)           | 0.022          |
| Model 2 ‡#                   | 1                         | 0.83 (0.66,1.04)                  | 0.82 (0.63,1.06)           | 0.071          |
| Model 3 §#                   | 1                         | 0.88 (0.70,1.11)                  | 0.90 (0.69,1.18)           | 0.325          |
| <b>Total ischemic stroke</b> |                           |                                   |                            |                |
| No. of cases                 | 207                       | 104                               | 69                         |                |
| Person-years                 | 86,645.2                  | 50,078.8                          | 34,415.4                   |                |
| Incidence rate *             | 2.39 (2.08,2.74)          | 2.08 (1.71,2.52)                  | 2.00 (1.58,2.54)           |                |
| Model 1 †#                   | 1                         | 0.85 (0.67,1.08)                  | 0.81 (0.62,1.07)           | 0.099          |
| Model 2 ‡#                   | 1                         | 0.89 (0.70,1.13)                  | 0.86 (0.65,1.13)           | 0.221          |
| Model 3 §#                   | 1                         | 0.96 (0.75,1.21)                  | 0.96 (0.73,1.28)           | 0.736          |

\* Incidence rate per 1,000 person-years.

† Adjusted for age, sex and race-center.

‡ Adjusted for age, sex, race-center, cigarette-years and education.

§ Adjusted for age, sex, race-field center, cigarette-years, educational level, waist-to-hip ratio, systolic blood pressure, antihypertensive medication use, diabetes, left ventricular hypertrophy, HDL cholesterol, LDL cholesterol, lipoprotein(a),fibrinogen, van Willebrand Factor and white blood cell count.

# Not adjusted for race.

**Table S2. Race-specific multivariable adjusted hazard ratios and 95% confidence intervals for physical activity and ischemic stroke subtypes.**

|                             | <b>Poor<br/>Physical Activity</b> | <b>Intermediate<br/>Physical Activity</b> | <b>Ideal<br/>Physical Activity</b> | <b>P for<br/>trend</b> |
|-----------------------------|-----------------------------------|-------------------------------------------|------------------------------------|------------------------|
| <b>African-Americans</b>    |                                   |                                           |                                    |                        |
| <b>Lacunar stroke</b>       |                                   |                                           |                                    |                        |
| No. of cases                | 67                                | 6                                         | 8                                  |                        |
| Model 1 * §                 | 1                                 | 0.50 (0.21,1.16)                          | 0.78 (0.37,1.64)                   | 0.235                  |
| Model 2 † §                 | 1                                 | 0.57 (0.25,1.34)                          | 0.93 (0.44,1.96)                   | 0.512                  |
| Model 3 ‡ §                 | 1                                 | 0.57 (0.25,1.34)                          | 1.04 (0.49,2.21)                   | 0.667                  |
| <b>Cardioembolic stroke</b> |                                   |                                           |                                    |                        |
| No. of cases                | 47                                | 7                                         | 2                                  |                        |
| Model 1 * §                 | 1                                 | 0.95 (0.43,2.13)                          | 0.32 (0.08,1.31)                   | 0.137                  |
| Model 2 † §                 | 1                                 | 1.07 (0.48,2.41)                          | 0.36 (0.09,1.50)                   | 0.234                  |
| Model 3 ‡ §                 | 1                                 | 1.11 (0.49,2.51)                          | 0.36 (0.09,1.49)                   | 0.242                  |
| <b>Nonlacunar stroke</b>    |                                   |                                           |                                    |                        |
| No. of cases                | 109                               | 18                                        | 4                                  |                        |
| Model 1 * §                 | 1                                 | 0.86 (0.51,1.42)                          | 0.24 (0.09,0.65)                   | 0.005                  |
| Model 2 † §                 | 1                                 | 0.94 (0.57,1.57)                          | 0.27 (0.10,0.73)                   | 0.014                  |
| Model 3 ‡ §                 | 1                                 | 1.02 (0.61,1.71)                          | 0.30 (0.11,0.81)                   | 0.037                  |
| <b>Caucasians</b>           |                                   |                                           |                                    |                        |
| <b>Lacunar stroke</b>       |                                   |                                           |                                    |                        |
| No. of cases                | 34                                | 18                                        | 11                                 |                        |
| Model 1 * §                 | 1                                 | 0.86 (0.48,1.53)                          | 0.71 (0.36,1.42)                   | 0.320                  |
| Model 2 † §                 | 1                                 | 0.92 (0.52,1.64)                          | 0.79 (0.39,1.58)                   | 0.506                  |
| Model 3 ‡ §                 | 1                                 | 1.03 (0.57,1.84)                          | 0.97 (0.48,1.97)                   | 0.969                  |
| <b>Cardioembolic stroke</b> |                                   |                                           |                                    |                        |
| No. of cases                | 53                                | 23                                        | 18                                 |                        |
| Model 1 * §                 | 1                                 | 0.75 (0.46,1.22)                          | 0.84 (0.49,1.44)                   | 0.378                  |
| Model 2 † §                 | 1                                 | 0.77 (0.47,1.26)                          | 0.88 (0.51,1.51)                   | 0.480                  |
| Model 3 ‡ §                 | 1                                 | 0.83 (0.51,1.37)                          | 0.96 (0.55,1.68)                   | 0.758                  |
| <b>Nonlacunar stroke</b>    |                                   |                                           |                                    |                        |
| No. of cases                | 120                               | 63                                        | 40                                 |                        |
| Model 1 * §                 | 1                                 | 0.90 (0.66,1.22)                          | 0.83 (0.58,1.19)                   | 0.272                  |
| Model 2 † §                 | 1                                 | 0.93 (0.68,1.26)                          | 0.86 (0.60,1.24)                   | 0.406                  |
| Model 3 ‡ §                 | 1                                 | 0.99 (0.73,1.35)                          | 0.94 (0.65,1.37)                   | 0.779                  |

\* Adjusted for age, sex and race-center.

† Adjusted for age, sex, race-center, cigarette-years and education.

‡ Adjusted for age, sex, race-field center, cigarette-years, educational level, waist-to-hip ratio, systolic blood pressure, antihypertensive medication use, diabetes, left ventricular hypertrophy, HDL cholesterol, LDL cholesterol, lipoprotein(a), fibrinogen, van Willebrand Factor and white blood cell count.

§ Not adjusted for race.

**Table S3. Multivariate adjusted Hazard ratios and 95% confidence intervals for quartiles\* of physical activity and total and ischemic stroke**

|                              | Sport Score         |                     |                     |                     |             | Leisure Score       |                     |                     |                     |             |
|------------------------------|---------------------|---------------------|---------------------|---------------------|-------------|---------------------|---------------------|---------------------|---------------------|-------------|
|                              | Q1                  | Q2                  | Q3                  | Q4                  | P for trend | Q1                  | Q2                  | Q3                  | Q4                  | P for trend |
| <b>Total stroke</b>          |                     |                     |                     |                     |             |                     |                     |                     |                     |             |
| No. of cases                 | 247                 | 173                 | 197                 | 123                 |             | 304                 | 122                 | 200                 | 114                 |             |
| Person-years                 | 62,091.9            | 52,870.8            | 64,135.0            | 46,473.1            |             | 74,553.7            | 38,938.4            | 69,255.0            | 42,823.6            |             |
| Incidence rate <sup>†</sup>  | 3.98<br>(3.51,4.51) | 3.27<br>(2.82,3.80) | 3.07<br>(2.67,3.53) | 2.65<br>(2.22,3.16) |             | 4.08<br>(3.64,4.56) | 3.13<br>(2.62,3.74) | 2.89<br>(2.51,3.32) | 2.66<br>(2.22,3.20) |             |
| Model 1 <sup>‡</sup>         | 1                   | 0.81<br>(0.67,0.99) | 0.84<br>(0.70,1.02) | 0.76<br>(0.61,0.96) | 0.021       | 1                   | 0.94<br>(0.76,1.17) | 0.90<br>(0.75,1.08) | 0.86<br>(0.69,1.07) | 0.134       |
| Model 2 <sup>§</sup>         | 1                   | 0.81<br>(0.67,0.98) | 0.89<br>(0.73,1.08) | 0.82<br>(0.66,1.03) | 0.117       | 1                   | 0.99<br>(0.80,1.23) | 0.95<br>(0.79,1.14) | 0.93<br>(0.75,1.17) | 0.479       |
| Model 3 <sup>#</sup>         | 1                   | 0.85<br>(0.70,1.04) | 0.93<br>(0.77,1.13) | 0.93<br>(0.74,1.17) | 0.540       | 1                   | 1.02<br>(0.82,1.26) | 1.00<br>(0.83,1.21) | 1.04<br>(0.83,1.31) | 0.789       |
| <b>Total ischemic stroke</b> |                     |                     |                     |                     |             |                     |                     |                     |                     |             |
| No. of cases                 | 211                 | 155                 | 167                 | 115                 |             | 267                 | 107                 | 171                 | 103                 |             |
| Person-years                 | 62,263.8            | 52,961.2            | 64,244.3            | 46,521.5            |             | 74,736.3            | 39,012.2            | 69,375.2            | 42,867.1            |             |
| Incidence rate <sup>†</sup>  | 3.39<br>(2.96,3.88) | 2.93<br>(2.50,3.43) | 2.60<br>(2.23,3.03) | 2.47<br>(2.06,2.97) |             | 3.57<br>(3.17,4.03) | 2.74<br>(2.27,3.31) | 2.46<br>(2.12,2.86) | 2.40<br>(1.98,2.91) |             |
| Model 1 <sup>‡</sup>         | 1                   | 0.85<br>(0.69,1.04) | 0.83<br>(0.67,1.02) | 0.82<br>(0.65,1.04) | 0.065       | 1                   | 0.93<br>(0.74,1.17) | 0.87<br>(0.71,1.06) | 0.88<br>(0.69,1.11) | 0.152       |
| Model 2 <sup>§</sup>         | 1                   | 0.85<br>(0.69,1.04) | 0.87<br>(0.71,1.07) | 0.89<br>(0.70,1.12) | 0.261       | 1                   | 0.99<br>(0.78,1.24) | 0.92<br>(0.75,1.12) | 0.95<br>(0.75,1.21) | 0.483       |
| Model 3 <sup>#</sup>         | 1                   | 0.89<br>(0.72,1.10) | 0.91<br>(0.74,1.12) | 1.01<br>(0.79,1.28) | 0.848       | 1                   | 1.01<br>(0.80,1.27) | 0.97<br>(0.80,1.19) | 1.07<br>(0.85,1.36) | 0.762       |

\* Cut-points for the approximated quartiles were 1.75/2.25/3.0 for the sport score and 2.0/2.25/2.75 for the leisure score.

† Incidence rate per 1000 person-years.

‡ Adjusted for age, sex and race-center.

§ Adjusted for age, sex, race-center, cigarette-years and education.

# Adjusted for age, sex, race-field center, cigarette-years, educational level, waist-to-hip ratio, systolic blood pressure, antihypertensive medication use, diabetes, left ventricular hypertrophy, HDL cholesterol, LDL cholesterol, lipoprotein(a), fibrinogen, van Willebrand Factor and white blood cell count.

**Table S4. Multivariate adjusted Hazard ratios and 95% confidence intervals for quartiles\* of physical activity and ischemic stroke subtypes**

|                             | Sports |                     |                     |                     |             | Leisure |                     |                     |                     |             |
|-----------------------------|--------|---------------------|---------------------|---------------------|-------------|---------|---------------------|---------------------|---------------------|-------------|
|                             | Q1     | Q2                  | Q3                  | Q4                  | P for trend | Q1      | Q2                  | Q3                  | Q4                  | P for trend |
| <b>Lacunar stroke</b>       |        |                     |                     |                     |             |         |                     |                     |                     |             |
| No. of cases                | 42     | 41                  | 41                  | 20                  |             | 70      | 25                  | 30                  | 19                  |             |
| Model 1 <sup>†</sup>        | 1      | 1.19<br>(0.77,1.83) | 1.19<br>(0.76,1.84) | 0.88<br>(0.51,1.53) | 0.904       | 1       | 0.95<br>(0.60,1.52) | 0.69<br>(0.44,1.07) | 0.74<br>(0.44,1.25) | 0.010       |
| Model 2 <sup>‡</sup>        | 1      | 1.17<br>(0.76,1.80) | 1.28<br>(0.83,2.00) | 1.00<br>(0.57,1.73) | 0.672       | 1       | 1.03<br>(0.65,1.65) | 0.75<br>(0.48,1.17) | 0.83<br>(0.49,1.41) | 0.254       |
| Model 3 <sup>§</sup>        | 1      | 1.21<br>(0.79,1.87) | 1.33<br>(0.86,2.08) | 1.16<br>(0.66,2.02) | 0.365       | 1       | 1.04<br>(0.65,1.67) | 0.78<br>(0.50,1.22) | 0.93<br>(0.55,1.59) | 0.452       |
| <b>Cardioembolic stroke</b> |        |                     |                     |                     |             |         |                     |                     |                     |             |
| No. of cases                | 47     | 41                  | 33                  | 29                  |             | 60      | 29                  | 37                  | 24                  |             |
| Model 1 <sup>†</sup>        | 1      | 0.99<br>(0.65,1.51) | 0.73<br>(0.46,1.14) | 0.92<br>(0.57,1.48) | 0.395       | 1       | 1.09<br>(0.69,1.72) | 0.79<br>(0.52,1.21) | 0.85<br>(0.52,1.39) | 0.294       |
| Model 2 <sup>‡</sup>        | 1      | 0.99<br>(0.65,1.50) | 0.76<br>(0.48,1.20) | 0.98<br>(0.60,1.59) | 0.594       | 1       | 1.14<br>(0.73,1.80) | 0.83<br>(0.54,1.27) | 0.92<br>(0.56,1.51) | 0.478       |
| Model 3 <sup>§</sup>        | 1      | 1.04<br>(0.68,1.58) | 0.78<br>(0.49,1.23) | 1.11<br>(0.68,1.81) | 0.882       | 1       | 1.16<br>(0.73,1.83) | 0.86<br>(0.56,1.32) | 1.05<br>(0.64,1.73) | 0.789       |
| <b>Nonlacunar stroke</b>    |        |                     |                     |                     |             |         |                     |                     |                     |             |
| No. of cases                | 122    | 73                  | 93                  | 66                  |             | 137     | 53                  | 104                 | 60                  |             |
| Model 1 <sup>†</sup>        | 1      | 0.68<br>(0.51,0.91) | 0.75<br>(0.57,0.99) | 0.75<br>(0.55,1.02) | 0.060       | 1       | 0.87<br>(0.63,1.20) | 0.98<br>(0.75,1.28) | 0.95<br>(0.69,1.30) | 0.822       |
| Model 2 <sup>‡</sup>        | 1      | 0.69<br>(0.51,0.92) | 0.79<br>(0.60,1.04) | 0.80<br>(0.59,1.09) | 0.151       | 1       | 0.91<br>(0.66,1.26) | 1.03<br>(0.79,1.34) | 1.02<br>(0.74,1.40) | 0.792       |
| Model 3 <sup>§</sup>        | 1      | 0.72<br>(0.53,0.96) | 0.82<br>(0.62,1.08) | 0.91<br>(0.66,1.24) | 0.458       | 1       | 0.93<br>(0.68,1.29) | 1.10<br>(0.84,1.43) | 1.14<br>(0.83,1.57) | 0.325       |

\* Cut-points for the approximated quartiles were 1.75/2.25/3.0 for the sport score and 2.0/2.25/2.75 for the leisure score.

† Adjusted for age, sex and race-center.

‡ Adjusted for age, sex, race-center, cigarette-years and education

§ Adjusted for age, sex, race-field center, cigarette-years, educational level, waist-to-hip ratio, systolic blood pressure, antihypertensive medication use, diabetes, left ventricular hypertrophy, HDL cholesterol, LDL cholesterol, lipoprotein(a),fibrinogen, van Willebrand Factor and white blood cell count.
